# Supplementary material for: The prognosis analysis of different metastasis pattern in patients with different breast cancer subtypes: a SEER based study
Source: PubMed Central journal article supplement (PMC5432264; doi:10.18632/oncotarget.14300), 2016-12-27
Supplement: oncotarget-08-26368-s001.pdf [file oncotarget-08-26368-s001.pdf]

## The prognosis analysis of different metastasis pattern in patients with different breast cancer subtypes: a SEER based study

### SUPPLEMENTARY FIGURE

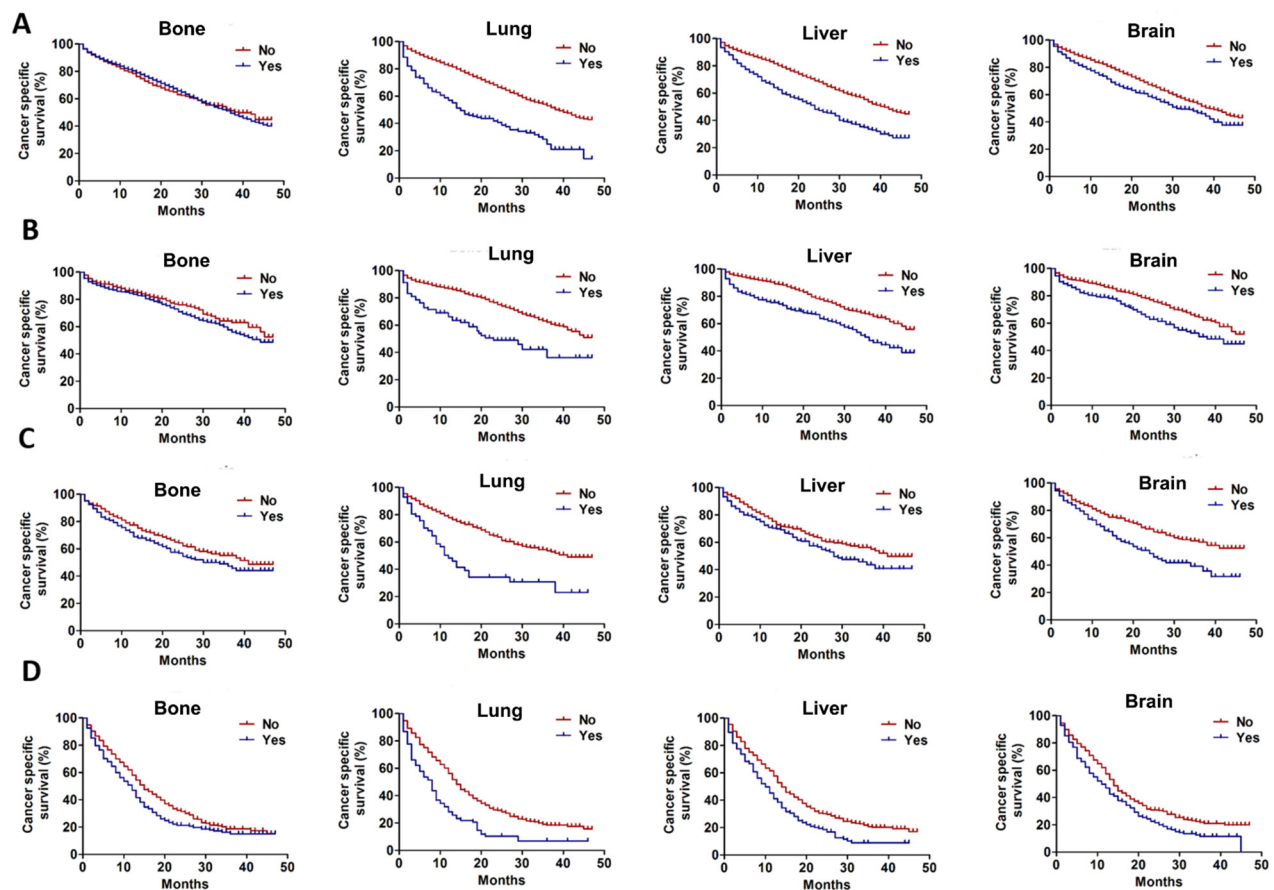

**Supplementary Figure 1: The effect of specific metastasis site on CSS in breast cancer patients according different BCS.** **A.** the effect of specific metastasis site on CSS in breast cancer patients with HR+/HER2- (bone:  $\chi^2=0.085$ ,  $P=0.770$ ; lung:  $\chi^2=111.75$ ,  $P<0.001$ ; liver:  $\chi^2=158.71$ ,  $P<0.001$ ; brain:  $\chi^2=45.17$ ,  $P<0.001$ ). **B.** the effect of specific metastasis site on CSS in breast cancer patients with HR+/HER2+ (bone:  $\chi^2=1.82$ ,  $P=0.177$ ; lung:  $\chi^2=20.163$ ,  $P<0.001$ ; liver:  $\chi^2=52.81$ ,  $P<0.001$ ; brain:  $\chi^2=15.75$ ,  $P<0.001$ ). **C.** the effect of specific metastasis site on CSS in breast cancer patients with HR-/HER2+ (bone:  $\chi^2=4.11$ ,  $P=0.043$ ; lung:  $\chi^2=28.64$ ,  $P<0.001$ ; liver:  $\chi^2=15.58$ ,  $P<0.001$ ; brain:  $\chi^2=20.34$ ,  $P<0.001$ ). **D.** the effect of specific metastasis site on CSS in breast cancer patients with HR-/HER2- (bone:  $\chi^2=15.10$ ,  $P<0.001$ ; lung:  $\chi^2=39.94$ ,  $P<0.001$ ; liver:  $\chi^2=29.93$ ,  $P<0.001$ ; brain:  $\chi^2=18.54$ ,  $P<0.001$ ).
